# Supplementary material for: Climate stability hinges on energy-material feedback dynamics: aluminum perspectives
Source: Research Square preprint supplement (doi:10.21203/rs.3.rs-5974514/v1), 2025-04-13
Supplement: Supplementary file 1 [file 4af213fb47b18c99b4f9bd36.xlsx]

## Sheet: Cover
Supplementary materials for
"Climate stability hinges on energy-material feedback dynamics: aluminum perspectives"
Harald Desing	Empa - Swiss Federal Laboratories for Materials Science and Technology, Technology and Society Laboratory, Lerchenfeldstrasse 5, 9014 St. Gallen, Switzerland
Marinella Passarella	Chair of Mining Engineering and Mineral Economics, Montanuniversität Leoben, Franz Josef Straße 18, Leoben, 8700, Austria
Romain Guillaume Billy	NTNU - Norwegian University of Science and Technology, Department of Energy and Process Engineering, Høgskoleringen 5 NO-7034 Trondheim, Norway
Alexander Griebler	Chair of Mining Engineering and Mineral Economics, Montanuniversität Leoben, Franz Josef Straße 18, Leoben, 8700, Austria
Moritz Langhorst	NTNU - Norwegian University of Science and Technology, Department of Energy and Process Engineering, Høgskoleringen 5 NO-7034 Trondheim, Norway
Stefan Pogatscher	Chair of Nonferrous Metallurgy, Montanuniversität Leoben, Franz Josef Straße18, Leoben, 8700, Austria
Dierk Raabe	Max Planck Institute for Sustainable Materials, Department Microstructure Physics and Alloy Design Sustainable Synthesis of Materials, Max-Planck-Straße 1, 40237 Düsseldorf, Germany
Kirsten Remmen	Empa - Swiss Federal Laboratories for Materials Science and Technology, Technology and Society Laboratory, Lerchenfeldstrasse 5, 9014 St. Gallen, Switzerland
Sebastian Samberger	Chair of Nonferrous Metallurgy, Montanuniversität Leoben, Franz Josef Straße18, Leoben, 8700, Austria
Hauke Schlesier	Empa - Swiss Federal Laboratories for Materials Science and Technology, Technology and Society Laboratory, Lerchenfeldstrasse 5, 9014 St. Gallen, Switzerland
Daniel Beat Müller	NTNU - Norwegian University of Science and Technology, Department of Energy and Process Engineering, Høgskoleringen 5 NO-7034 Trondheim, Norway
Michael Tost	Chair of Mining Engineering and Mineral Economics, Montanuniversität Leoben, Franz Josef Straße 18, Leoben, 8700, Austria
Corresponding authors
harald.desing@empa.ch
daniel.mueller@ntnu.no
Parameters	In this tap, all the parameters are listed that are the same for all scenarios. Also, those parameters influential on the model and added from the energy-feedback model version ("3-machines model", Desing et al. 2022) are tested on sensitivity in specified ranges
Scenarios	In this tap, all parameters unique for each scenario variant are listed

## Sheet: Parameters
			Base	sensitivity range							Sensitivity runs: parameter sets -->
sector	Variable name	Unit	Value	min	max	comment	sensitivity run #	Reference	Description	base	1	2	3	4	5	6	7	8	9	10	11	12	13	14	15	16	17	18	19	20	21	22	23	24	25	26	27	28	29	30	31	32	33	34	35	36	37	38	39
Al	Al in ground	Gt	75			practically no influence on model		USGS_2021	resources in 2026	75	75	75	75	75	75	75	75	75	75	75	75	75	75	75	75	75	75	75	75	75	75	75	75	75	75	75	75	75	75	75	75	75	75	75	75	75	75	75	75
society+fossil	Al in-use 2026	Gt	1.485			historical		https://alucycle.international-aluminium.org/public-access/public-global-cycle/	in use stocks of Al in 2026	1.485	1.485	1.485	1.485	1.485	1.485	1.485	1.485	1.485	1.485	1.485	1.485	1.485	1.485	1.485	1.485	1.485	1.485	1.485	1.485	1.485	1.485	1.485	1.485	1.485	1.485	1.485	1.485	1.485	1.485	1.485	1.485	1.485	1.485	1.485	1.485	1.485	1.485	1.485	1.485
fossil	Al in fossil 2026	Gt	0.163			historical		Schlesier et al. 2024, Al stocks in cars estimated on Prosum.eu data	in use stocks in the fossil energy system (including cars)	0.163	0.163	0.163	0.163	0.163	0.163	0.163	0.163	0.163	0.163	0.163	0.163	0.163	0.163	0.163	0.163	0.163	0.163	0.163	0.163	0.163	0.163	0.163	0.163	0.163	0.163	0.163	0.163	0.163	0.163	0.163	0.163	0.163	0.163	0.163	0.163	0.163	0.163	0.163	0.163
Al	Al market stock 0	Gt	0.01	0.001	0.01		1	selected to ensure system stability	market stockpile in 2026	0.01	0.001	0.01	0.01	0.01	0.01	0.01	0.01	0.01	0.01	0.01	0.01	0.01	0.01	0.01	0.01	0.01	0.01	0.01	0.01	0.01	0.01	0.01	0.01	0.01	0.01	0.01	0.01	0.01	0.01	0.01	0.01	0.01	0.01	0.01	0.01	0.01	0.01	0.01	0.01
Al	Al market filling target	Gt	0.02	0.005	0.05		2	selected to ensure system stability	target market stockpilte	0.02	0.02	0.005	0.02	0.02	0.02	0.02	0.02	0.02	0.02	0.02	0.02	0.02	0.02	0.02	0.02	0.02	0.02	0.02	0.02	0.02	0.02	0.02	0.02	0.02	0.02	0.02	0.02	0.02	0.02	0.02	0.02	0.02	0.02	0.02	0.02	0.02	0.02	0.02	0.02
Al	Al waste	Gt	0.5			0		75% of Al ever produced still in use; IAI	accumulated wastes of Al in 2026	0.5	0.5	0.5	0.5	0.5	0.5	0.5	0.5	0.5	0.5	0.5	0.5	0.5	0.5	0.5	0.5	0.5	0.5	0.5	0.5	0.5	0.5	0.5	0.5	0.5	0.5	0.5	0.5	0.5	0.5	0.5	0.5	0.5	0.5	0.5	0.5	0.5	0.5	0.5	0.5
Al	Al dilution ratio 0	-	1.54			calculated		https://alucycle.international-aluminium.org/public-access/public-global-cycle/	dilution ratio at the beginning of the simulation; calculated from primary over secondary production flows in 2026	1.54	1.54	1.54	1.54	1.54	1.54	1.54	1.54	1.54	1.54	1.54	1.54	1.54	1.54	1.54	1.54	1.54	1.54	1.54	1.54	1.54	1.54	1.54	1.54	1.54	1.54	1.54	1.54	1.54	1.54	1.54	1.54	1.54	1.54	1.54	1.54	1.54	1.54	1.54	1.54
Al	AL prim CF 2	-	0.88	0.75	0.9		3,4	Langhorst et al. 2024	capacity factor of primary aluminium production at the beginning of the simulation	0.88	0.88	0.88	0.75	0.9	0.88	0.88	0.88	0.88	0.88	0.88	0.88	0.88	0.88	0.88	0.88	0.88	0.88	0.88	0.88	0.88	0.88	0.88	0.88	0.88	0.88	0.88	0.88	0.88	0.88	0.88	0.88	0.88	0.88	0.88	0.88	0.88	0.88	0.88	0.88
Al	Al old prim capacity 0	Gt/a	0.0798409	0.09368	0.0780667		3,4	calculated	Al primary capacity at the beginning of the simulation	0.0798409	0.0798409	0.0798409	0.09368	0.0780667	0.0798409	0.0798409	0.0798409	0.0798409	0.0798409	0.0798409	0.0798409	0.0798409	0.0798409	0.0798409	0.0798409	0.0798409	0.0798409	0.0798409	0.0798409	0.0798409	0.0798409	0.0798409	0.0798409	0.0798409	0.0798409	0.0798409	0.0798409	0.0798409	0.0798409	0.0798409	0.0798409	0.0798409	0.0798409	0.0798409	0.0798409	0.0798409	0.0798409	0.0798409	0.0798409
Al	Al old prim cap lifetime	a	45	40	50		5,6	Langhorst et al. 2024	average lifetime of old primary capacity	45	45	45	45	45	40	50	45	45	45	45	45	45	45	45	45	45	45	45	45	45	45	45	45	45	45	45	45	45	45	45	45	45	45	45	45	45	45	45	45
Al	Al prim cap min lifetime	a	10	5	15		7,8	estimate	minimum lifetime of newly added primary capacity	10	10	10	10	10	10	10	5	15	10	10	10	10	10	10	10	10	10	10	10	10	10	10	10	10	10	10	10	10	10	10	10	10	10	10	10	10	10	10	10
Al	Al prim cap lifetime	a	45	40	50		5,6	Langhorst et al. 2024	average lifetime of newly added primary capacity	45	45	45	45	45	40	50	45	45	45	45	45	45	45	45	45	45	45	45	45	45	45	45	45	45	45	45	45	45	45	45	45	45	45	45	45	45	45	45	45
Al	Al old recycling capacity 0	Gt/a	0.055	0.051	0.083		9,10	estimate based on estimated CF=0.84 (value), CF=0.55 (max), CF=0.9 (min)	Al recycling capacity installed in 2026	0.055	0.055	0.055	0.055	0.055	0.055	0.055	0.055	0.055	0.051	0.083	0.055	0.055	0.055	0.055	0.055	0.055	0.055	0.055	0.055	0.055	0.055	0.055	0.055	0.055	0.055	0.055	0.055	0.055	0.055	0.055	0.055	0.055	0.055	0.055	0.055	0.055	0.055	0.055	0.055
Al	Al old sec cap lifetime	a	25	20	30		11,12	estimate	average lifetime of existing recycling capacity	25	25	25	25	25	25	25	25	25	25	25	20	30	25	25	25	25	25	25	25	25	25	25	25	25	25	25	25	25	25	25	25	25	25	25	25	25	25	25	25
Al	Al sec cap min lifetime	a	10	5	15		13,14	estimate	minimum lifetime of newly added recycling capacity	10	10	10	10	10	10	10	10	10	10	10	10	10	5	10	10	10	10	10	10	10	10	10	10	10	10	10	10	10	10	10	10	10	10	10	10	10	10	10	10
Al	Al sec cap lifetime	a	25	20	30		11,12	Langhorst et al. 2024	average lifetime of newly added recycling capacity	25	25	25	25	25	25	25	25	25	25	25	20	30	25	25	25	25	25	25	25	25	25	25	25	25	25	25	25	25	25	25	25	25	25	25	25	25	25	25	25
Al	AL sec production 2026	Gt/a	0.046			historical		https://alucycle.international-aluminium.org/public-access/public-global-cycle/	overall recycling rate including manufacturing scrap	0.046	0.046	0.046	0.046	0.046	0.046	0.046	0.046	0.046	0.046	0.046	0.046	0.046	0.046	0.046	0.046	0.046	0.046	0.046	0.046	0.046	0.046	0.046	0.046	0.046	0.046	0.046	0.046	0.046	0.046	0.046	0.046	0.046	0.046	0.046	0.046	0.046	0.046	0.046	0.046
Al	Al max RR EoL scrap	-	0.8	0.7	0.9		15,16	estimate	maximum recycling rate for Al for post-consumer scrap	0.8	0.8	0.8	0.8	0.8	0.8	0.8	0.8	0.8	0.8	0.8	0.8	0.8	0.8	0.8	0.7	0.9	0.8	0.8	0.8	0.8	0.8	0.8	0.8	0.8	0.8	0.8	0.8	0.8	0.8	0.8	0.8	0.8	0.8	0.8	0.8	0.8	0.8	0.8	0.8
Al	Al max RR manufacturing scrap	-	0.99	0.9			17	estimate	maximum recycling rate for Al for pre-consumer scrap	0.99	0.99	0.99	0.99	0.99	0.99	0.99	0.99	0.99	0.99	0.99	0.99	0.99	0.99	0.99	0.99	0.99	0.9	0.99	0.99	0.99	0.99	0.99	0.99	0.99	0.99	0.99	0.99	0.99	0.99	0.99	0.99	0.99	0.99	0.99	0.99	0.99	0.99	0.99	0.99
Al	manufacturing scarp fraction	-	0.178					https://alucycle.international-aluminium.org/public-access/public-global-cycle/	manufacturing scrap over flow of final products	0.178	0.178	0.178	0.178	0.178	0.178	0.178	0.178	0.178	0.178	0.178	0.178	0.178	0.178	0.178	0.178	0.178	0.178	0.178	0.178	0.178	0.178	0.178	0.178	0.178	0.178	0.178	0.178	0.178	0.178	0.178	0.178	0.178	0.178	0.178	0.178	0.178	0.178	0.178	0.178
Al	EI_Al prim cap construction	TW*a/(Gt/a)	0.000978					EI3.9.1	Energy intensity of constructing Al smelting furnaces and casting facitlites	0.000978	0.000978	0.000978	0.000978	0.000978	0.000978	0.000978	0.000978	0.000978	0.000978	0.000978	0.000978	0.000978	0.000978	0.000978	0.000978	0.000978	0.000978	0.000978	0.000978	0.000978	0.000978	0.000978	0.000978	0.000978	0.000978	0.000978	0.000978	0.000978	0.000978	0.000978	0.000978	0.000978	0.000978	0.000978	0.000978	0.000978	0.000978	0.000978	0.000978
Al	EI_Al prim prod new	TW*a/Gt	1.73651	1.56286	1.91016		54,55	see SI, +/-10%	energy intensity for primary Al production with new facilities	1.73651	1.73651	1.73651	1.73651	1.73651	1.73651	1.73651	1.73651	1.73651	1.73651	1.73651	1.73651	1.73651	1.73651	1.73651	1.73651	1.73651	1.73651	1.73651	1.73651	1.73651	1.73651	1.73651	1.73651	1.73651	1.73651	1.73651	1.73651	1.73651	1.73651	1.73651	1.73651	1.73651	1.73651	1.73651	1.73651	1.73651	1.73651	1.73651	1.73651
Al	EI_Al prim prod old	TW*a/Gt	2.1231	1.91079	2.33541		54,55	see SI, +/-10%	energy intensity for primary Al production with old facilities	2.1231	2.1231	2.1231	2.1231	2.1231	2.1231	2.1231	2.1231	2.1231	2.1231	2.1231	2.1231	2.1231	2.1231	2.1231	2.1231	2.1231	2.1231	2.1231	2.1231	2.1231	2.1231	2.1231	2.1231	2.1231	2.1231	2.1231	2.1231	2.1231	2.1231	2.1231	2.1231	2.1231	2.1231	2.1231	2.1231	2.1231	2.1231	2.1231	2.1231
Al	EI_Al sec cap construction	TW*a/(Gt/a)	0.000614					EI3.9.1	Energy intensity of constructing Al recycling facitlites	0.000614	0.000614	0.000614	0.000614	0.000614	0.000614	0.000614	0.000614	0.000614	0.000614	0.000614	0.000614	0.000614	0.000614	0.000614	0.000614	0.000614	0.000614	0.000614	0.000614	0.000614	0.000614	0.000614	0.000614	0.000614	0.000614	0.000614	0.000614	0.000614	0.000614	0.000614	0.000614	0.000614	0.000614	0.000614	0.000614	0.000614	0.000614	0.000614	0.000614
Al	EI_Al sec prod new	TW*a/Gt	0.316881	0.285193	0.348569		56,57	see SI, +/-10%	energy intensity for secondary Al production with new facilities	0.316881	0.316881	0.316881	0.316881	0.316881	0.316881	0.316881	0.316881	0.316881	0.316881	0.316881	0.316881	0.316881	0.316881	0.316881	0.316881	0.316881	0.316881	0.316881	0.316881	0.316881	0.316881	0.316881	0.316881	0.316881	0.316881	0.316881	0.316881	0.316881	0.316881	0.316881	0.316881	0.316881	0.316881	0.316881	0.316881	0.316881	0.316881	0.316881	0.316881
Al	EI_Al sec prod old	TW*a/Gt	0.316881	0.285193	0.348569		56,57	see SI, +/-10%	energy intensity for secondary Al production with old facilities	0.316881	0.316881	0.316881	0.316881	0.316881	0.316881	0.316881	0.316881	0.316881	0.316881	0.316881	0.316881	0.316881	0.316881	0.316881	0.316881	0.316881	0.316881	0.316881	0.316881	0.316881	0.316881	0.316881	0.316881	0.316881	0.316881	0.316881	0.316881	0.316881	0.316881	0.316881	0.316881	0.316881	0.316881	0.316881	0.316881	0.316881	0.316881	0.316881	0.316881
Al	Al energy intensity 0	TW*a/Gt	1.40844					calculated	energy intesity for producing Al at the start of simulaation	1.40844	1.40844	1.40844	1.40844	1.40844	1.40844	1.40844	1.40844	1.40844	1.40844	1.40844	1.40844	1.40844	1.40844	1.40844	1.40844	1.40844	1.40844	1.40844	1.40844	1.40844	1.40844	1.40844	1.40844	1.40844	1.40844	1.40844	1.40844	1.40844	1.40844	1.40844	1.40844	1.40844	1.40844	1.40844	1.40844	1.40844	1.40844	1.40844	1.40844
Al	EI_Al prim increase factor at CF=1	-	1.2	1	1.5		18,19	see SI	factor increasing energy intensity of primary Al production when CF = 1	1.2	1.2	1.2	1.2	1.2	1.2	1.2	1.2	1.2	1.2	1.2	1.2	1.2	1.2	1.2	1.2	1.2	1.2	1	1.5	1.2	1.2	1.2	1.2	1.2	1.2	1.2	1.2	1.2	1.2	1.2	1.2	1.2	1.2	1.2	1.2	1.2	1.2	1.2	1.2
Al	EI_Al prim increase factor at CF=0	-	1.1	1	1.5		20,21	see SI	factor increasing energy intensity of primary Al production when CF = 0	1.1	1.1	1.1	1.1	1.1	1.1	1.1	1.1	1.1	1.1	1.1	1.1	1.1	1.1	1.1	1.1	1.1	1.1	1.1	1.1	1	1.5	1.1	1.1	1.1	1.1	1.1	1.1	1.1	1.1	1.1	1.1	1.1	1.1	1.1	1.1	1.1	1.1	1.1	1.1
Al	Al prim CF_opt	-	0.8	0.7	0.9		22,23	see SI	optimal capacity factor for operating Al primary capacity	0.8	0.8	0.8	0.8	0.8	0.8	0.8	0.8	0.8	0.8	0.8	0.8	0.8	0.8	0.8	0.8	0.8	0.8	0.8	0.8	0.8	0.8	0.7	0.9	0.8	0.8	0.8	0.8	0.8	0.8	0.8	0.8	0.8	0.8	0.8	0.8	0.8	0.8	0.8	0.8
steel	energy intensity of primary steel production	TWa/Gt	0.333359					Ecoinvent 3.8		0.333359	0.333359	0.333359	0.333359	0.333359	0.333359	0.333359	0.333359	0.333359	0.333359	0.333359	0.333359	0.333359	0.333359	0.333359	0.333359	0.333359	0.333359	0.333359	0.333359	0.333359	0.333359	0.333359	0.333359	0.333359	0.333359	0.333359	0.333359	0.333359	0.333359	0.333359	0.333359	0.333359	0.333359	0.333359	0.333359	0.333359	0.333359	0.333359	0.333359
glass	energy intensity of solar glass production	TWa/Gt	0.16256					Ecoinvent 3.8		0.16256	0.16256	0.16256	0.16256	0.16256	0.16256	0.16256	0.16256	0.16256	0.16256	0.16256	0.16256	0.16256	0.16256	0.16256	0.16256	0.16256	0.16256	0.16256	0.16256	0.16256	0.16256	0.16256	0.16256	0.16256	0.16256	0.16256	0.16256	0.16256	0.16256	0.16256	0.16256	0.16256	0.16256	0.16256	0.16256	0.16256	0.16256	0.16256	0.16256
society	P_demand per person in 2026	W	948			historical		BP, world population	annual average energy demand per person converted in electric energy equivalents	948	948	948	948	948	948	948	948	948	948	948	948	948	948	948	948	948	948	948	948	948	948	948	948	948	948	948	948	948	948	948	948	948	948	948	948	948	948	948	948
society	gobal population 2026	-	8300000000			historical		https://www.worldometers.info/world-population/world-population-by-year/		8300000000	8300000000	8300000000	8300000000	8300000000	8300000000	8300000000	8300000000	8300000000	8300000000	8300000000	8300000000	8300000000	8300000000	8300000000	8300000000	8300000000	8300000000	8300000000	8300000000	8300000000	8300000000	8300000000	8300000000	8300000000	8300000000	8300000000	8300000000	8300000000	8300000000	8300000000	8300000000	8300000000	8300000000	8300000000	8300000000	8300000000	8300000000	8300000000	8300000000
society	P_RE_2026	TW	1.623			historical		IRENA, BP, IEA	power in the system that is already renewable in 2026	1.623	1.623	1.623	1.623	1.623	1.623	1.623	1.623	1.623	1.623	1.623	1.623	1.623	1.623	1.623	1.623	1.623	1.623	1.623	1.623	1.623	1.623	1.623	1.623	1.623	1.623	1.623	1.623	1.623	1.623	1.623	1.623	1.623	1.623	1.623	1.623	1.623	1.623	1.623	1.623
society	Al demand 0	Gt/a	0.0987			historical		https://alucycle.international-aluminium.org/public-access/public-global-cycle/	Al demand by society in 2026	0.0987	0.0987	0.0987	0.0987	0.0987	0.0987	0.0987	0.0987	0.0987	0.0987	0.0987	0.0987	0.0987	0.0987	0.0987	0.0987	0.0987	0.0987	0.0987	0.0987	0.0987	0.0987	0.0987	0.0987	0.0987	0.0987	0.0987	0.0987	0.0987	0.0987	0.0987	0.0987	0.0987	0.0987	0.0987	0.0987	0.0987	0.0987	0.0987	0.0987
society	Al lifetime	a	23	20	30		24,25	Langhorst et al. 2024	average lifetime of Al stocks newly build in society	23	23	23	23	23	23	23	23	23	23	23	23	23	23	23	23	23	23	23	23	23	23	23	23	20	30	23	23	23	23	23	23	23	23	23	23	23	23	23	23
fossil	fC_EPBT	a	3			already tested in Desing et al. 2022		https://publications.parliament.uk/pa/ld200304/ldselect/ldsctech/126/12620.htm	energy payback time of fossil energy systems	3	3	3	3	3	3	3	3	3	3	3	3	3	3	3	3	3	3	3	3	3	3	3	3	3	3	3	3	3	3	3	3	3	3	3	3	3	3	3	3
fossil	E_fC	TW*a	26.63			already tested in Desing et al. 2022		Desing et al. 2022	embodied energy in the fossil engine at t=0	26.63	26.63	26.63	26.63	26.63	26.63	26.63	26.63	26.63	26.63	26.63	26.63	26.63	26.63	26.63	26.63	26.63	26.63	26.63	26.63	26.63	26.63	26.63	26.63	26.63	26.63	26.63	26.63	26.63	26.63	26.63	26.63	26.63	26.63	26.63	26.63	26.63	26.63	26.63	26.63
fossil	T_LfC	a	30			already tested in Desing et al. 2022		Desing et al. 2022	average lifetime of newly installed fossil capacity (including cars, power plants, and heating systems)	30	30	30	30	30	30	30	30	30	30	30	30	30	30	30	30	30	30	30	30	30	30	30	30	30	30	30	30	30	30	30	30	30	30	30	30	30	30	30	30
fossil	T_LfC_min	a	25			already tested in Desing et al. 2022		Desing et al. 2022	minimal lifetime of embodied energy, i.e. all installations reach this lifetime	25	25	25	25	25	25	25	25	25	25	25	25	25	25	25	25	25	25	25	25	25	25	25	25	25	25	25	25	25	25	25	25	25	25	25	25	25	25	25	25
fossil	fossil Al intensity	Gt/(TW*a)	0.006121			calculated		calculated	0.163 Gt Alu in 26.63 TWa energy embodied in fossil stock	0.006121	0.006121	0.006121	0.006121	0.006121	0.006121	0.006121	0.006121	0.006121	0.006121	0.006121	0.006121	0.006121	0.006121	0.006121	0.006121	0.006121	0.006121	0.006121	0.006121	0.006121	0.006121	0.006121	0.006121	0.006121	0.006121	0.006121	0.006121	0.006121	0.006121	0.006121	0.006121	0.006121	0.006121	0.006121	0.006121	0.006121	0.006121	0.006121	0.006121
clean-up	EIT_DAC 0	a	0.116	0.1	0.25		26,27	Qiu et al. 2022	Time of energy investment necessary to build the infrastructure for DAC Energy invested 15 MWa for 60 MW nominal power = 15/60a=0.25a	0.116	0.116	0.116	0.116	0.116	0.116	0.116	0.116	0.116	0.116	0.116	0.116	0.116	0.116	0.116	0.116	0.116	0.116	0.116	0.116	0.116	0.116	0.116	0.116	0.116	0.116	0.1	0.25	0.116	0.116	0.116	0.116	0.116	0.116	0.116	0.116	0.116	0.116	0.116	0.116
clean-up	T_resCCS	a	25			already tested in Desing et al. 2022		Desing et al. 2022	average lifetime of CCS capacity	25	25	25	25	25	25	25	25	25	25	25	25	25	25	25	25	25	25	25	25	25	25	25	25	25	25	25	25	25	25	25	25	25	25	25	25	25	25	25	25
clean-up	T_resCCS_min	a	20			already tested in Desing et al. 2022		Desing et al. 2022	minimal lifetime of capacity, i.e. all installations reach this lifetime	20	20	20	20	20	20	20	20	20	20	20	20	20	20	20	20	20	20	20	20	20	20	20	20	20	20	20	20	20	20	20	20	20	20	20	20	20	20	20	20
clean-up	DAC energy intensity	TW/(Gt/a)	0.15844	0.1	0.2		28,29	see SI	energy intensity for removing CO2 from the atmosphere by using direct air capture systems (DAC)	0.15844	0.15844	0.15844	0.15844	0.15844	0.15844	0.15844	0.15844	0.15844	0.15844	0.15844	0.15844	0.15844	0.15844	0.15844	0.15844	0.15844	0.15844	0.15844	0.15844	0.15844	0.15844	0.15844	0.15844	0.15844	0.15844	0.15844	0.15844	0.1	0.2	0.15844	0.15844	0.15844	0.15844	0.15844	0.15844	0.15844	0.15844	0.15844	0.15844
clean-up	DAC Al intensity 0	Gt/(TW*a)	0.010098	0.001	0.1		30,31.32	Qiu et al. 2022	Al intensity of DAC at t=0	0.010098	0.010098	0.010098	0.010098	0.010098	0.010098	0.010098	0.010098	0.010098	0.010098	0.010098	0.010098	0.010098	0.010098	0.010098	0.010098	0.010098	0.010098	0.010098	0.010098	0.010098	0.010098	0.010098	0.010098	0.010098	0.010098	0.010098	0.010098	0.010098	0.010098	0.001	0.1	0.1	0.010098	0.010098	0.010098	0.010098	0.010098	0.010098	0.010098
clean-up	DAC Al intensity inf	Gt/(TW*a)	0.000316	0.0001	0.1		32	Qiu et al. 2022	Al intensity of DAC approached assymtotically	0.000316	0.000316	0.000316	0.000316	0.000316	0.000316	0.000316	0.000316	0.000316	0.000316	0.000316	0.000316	0.000316	0.000316	0.000316	0.000316	0.000316	0.000316	0.000316	0.000316	0.000316	0.000316	0.000316	0.000316	0.000316	0.000316	0.000316	0.000316	0.000316	0.000316	0.000316	0.000316	0.1	0.000316	0.000316	0.000316	0.000316	0.000316	0.000316	0.000316
PV	EPBT_PV 0	a	1.5	1	2		33,34	Desing et al. 2022	energy payback time of PV systems at the start of the simulation	1.5	1.5	1.5	1.5	1.5	1.5	1.5	1.5	1.5	1.5	1.5	1.5	1.5	1.5	1.5	1.5	1.5	1.5	1.5	1.5	1.5	1.5	1.5	1.5	1.5	1.5	1.5	1.5	1.5	1.5	1.5	1.5	1.5	1	2	1.5	1.5	1.5	1.5	1.5
PV	PV Al intensity framed	Gt/TW	0.16474	0.163	0.277		35,36	Wang et al, 2023, IRENA_2022	Al intensity of PV systems with Al frames and Al mounting systems	0.16474	0.16474	0.16474	0.16474	0.16474	0.16474	0.16474	0.16474	0.16474	0.16474	0.16474	0.16474	0.16474	0.16474	0.16474	0.16474	0.16474	0.16474	0.16474	0.16474	0.16474	0.16474	0.16474	0.16474	0.16474	0.16474	0.16474	0.16474	0.16474	0.16474	0.16474	0.16474	0.16474	0.16474	0.16474	0.163	0.277	0.16474	0.16474	0.16474
PV	PV Al intensity frameless	Gt/TW	0.00700203	0.00630182	0.00770223		37,38	see SI, +/- 10%	Al intensity of PV systems with frameless panels and steel mounting systems	0.00700203	0.00700203	0.00700203	0.00700203	0.00700203	0.00700203	0.00700203	0.00700203	0.00700203	0.00700203	0.00700203	0.00700203	0.00700203	0.00700203	0.00700203	0.00700203	0.00700203	0.00700203	0.00700203	0.00700203	0.00700203	0.00700203	0.00700203	0.00700203	0.00700203	0.00700203	0.00700203	0.00700203	0.00700203	0.00700203	0.00700203	0.00700203	0.00700203	0.00700203	0.00700203	0.00700203	0.00700203	0.00630182	0.00770223	0.00700203
PV	PV steel intensity framed	Gt/TW	0.0607099	0.0546389	0.0667809		39,40	see SI, +/- 10%		0.0607099	0.0607099	0.0607099	0.0607099	0.0607099	0.0607099	0.0607099	0.0607099	0.0607099	0.0607099	0.0607099	0.0607099	0.0607099	0.0607099	0.0607099	0.0607099	0.0607099	0.0607099	0.0607099	0.0607099	0.0607099	0.0607099	0.0607099	0.0607099	0.0607099	0.0607099	0.0607099	0.0607099	0.0607099	0.0607099	0.0607099	0.0607099	0.0607099	0.0607099	0.0607099	0.0607099	0.0607099	0.0607099	0.0607099	0.0546389
PV	PV steel intensity frameless	Gt/TW	0.087333	0.0785997	0.0960663		41,42	see SI, +/- 10%		0.087333	0.087333	0.087333	0.087333	0.087333	0.087333	0.087333	0.087333	0.087333	0.087333	0.087333	0.087333	0.087333	0.087333	0.087333	0.087333	0.087333	0.087333	0.087333	0.087333	0.087333	0.087333	0.087333	0.087333	0.087333	0.087333	0.087333	0.087333	0.087333	0.087333	0.087333	0.087333	0.087333	0.087333	0.087333	0.087333	0.087333	0.087333	0.087333	0.087333
PV	PV glass intensity framed	Gt/TW	0.307781	0.277003	0.33856		43,44	see SI, +/- 10%		0.307781	0.307781	0.307781	0.307781	0.307781	0.307781	0.307781	0.307781	0.307781	0.307781	0.307781	0.307781	0.307781	0.307781	0.307781	0.307781	0.307781	0.307781	0.307781	0.307781	0.307781	0.307781	0.307781	0.307781	0.307781	0.307781	0.307781	0.307781	0.307781	0.307781	0.307781	0.307781	0.307781	0.307781	0.307781	0.307781	0.307781	0.307781	0.307781	0.307781
PV	PV glass intensity frameless	Gt/TW	0.384727	0.346254	0.423199		45,46	see SI, +/- 10%		0.384727	0.384727	0.384727	0.384727	0.384727	0.384727	0.384727	0.384727	0.384727	0.384727	0.384727	0.384727	0.384727	0.384727	0.384727	0.384727	0.384727	0.384727	0.384727	0.384727	0.384727	0.384727	0.384727	0.384727	0.384727	0.384727	0.384727	0.384727	0.384727	0.384727	0.384727	0.384727	0.384727	0.384727	0.384727	0.384727	0.384727	0.384727	0.384727	0.384727
PV	T_resPV	a	30	20	40	already tested in Desing et al. 2022		Desing et al. 2022	average lifetime of renewable energy capacity	30	30	30	30	30	30	30	30	30	30	30	30	30	30	30	30	30	30	30	30	30	30	30	30	30	30	30	30	30	30	30	30	30	30	30	30	30	30	30	30
PV	T_resPV_min	a	25	15		already tested in Desing et al. 2022		Desing et al. 2022	minimal lifetime of capacity, i.e. all installations reach this lifetime	25	25	25	25	25	25	25	25	25	25	25	25	25	25	25	25	25	25	25	25	25	25	25	25	25	25	25	25	25	25	25	25	25	25	25	25	25	25	25	25
CO2	CO2_inAtm&UpperOcean	Gt	2682			historical		IPCC_2023, Friedlingsstein_2023	Cumulative CO2 emission since 1850 remaining in atmosphere and upper ocean. Atmosphere and upper ocean are in short term and constant exchange, therefore both stocks are coupled and for simplicity combined.	2682	2682	2682	2682	2682	2682	2682	2682	2682	2682	2682	2682	2682	2682	2682	2682	2682	2682	2682	2682	2682	2682	2682	2682	2682	2682	2682	2682	2682	2682	2682	2682	2682	2682	2682	2682	2682	2682	2682	2682
CO2	natural leak	Gt/a	0.8			historical		Stein_1991, IPCC_2007, Desing et al. 2022	CO2 removal from the atmosphere by natural background rate (sedimentation + weathering - volcanism)	0.8	0.8	0.8	0.8	0.8	0.8	0.8	0.8	0.8	0.8	0.8	0.8	0.8	0.8	0.8	0.8	0.8	0.8	0.8	0.8	0.8	0.8	0.8	0.8	0.8	0.8	0.8	0.8	0.8	0.8	0.8	0.8	0.8	0.8	0.8	0.8	0.8	0.8	0.8	0.8
CO2	fC emission intensity	(Gt/a)/TW	5.64			already tested in Desing et al. 2022		Desing et al. 2022	Conversion factor from power output of fC to the linked flux 35.75 Gt/a fossil emissions (2023) / 6.34 TW P_demand_0	5.64	5.64	5.64	5.64	5.64	5.64	5.64	5.64	5.64	5.64	5.64	5.64	5.64	5.64	5.64	5.64	5.64	5.64	5.64	5.64	5.64	5.64	5.64	5.64	5.64	5.64	5.64	5.64	5.64	5.64	5.64	5.64	5.64	5.64	5.64	5.64	5.64	5.64	5.64	5.64
CO2	post combustion CCS energy intensity	TW/(Gt/a)	0.06			already tested in Desing et al. 2022		Desing et al. 2022	energy required to capture CO2 from stack	0.06	0.06	0.06	0.06	0.06	0.06	0.06	0.06	0.06	0.06	0.06	0.06	0.06	0.06	0.06	0.06	0.06	0.06	0.06	0.06	0.06	0.06	0.06	0.06	0.06	0.06	0.06	0.06	0.06	0.06	0.06	0.06	0.06	0.06	0.06	0.06	0.06	0.06	0.06	0.06
CO2	Al CO2 intensity	-	3	2.4	3.6		47,48	PFC, CO2, and auxilliary materials (max) https://international-aluminium.org/statistics/greenhouse-gas-emissions-intensity-primary-aluminium/	direct process emissions; kg CO2 per kg primary Al; see EI391	3	3	3	3	3	3	3	3	3	3	3	3	3	3	3	3	3	3	3	3	3	3	3	3	3	3	3	3	3	3	3	3	3	3	3	3	3	3	3	3
CO2	TCRE 50	°C/1000 Gt	0.45			uncertainty calculated externally		IPCC_2021	transient climate response to cumulative CO2 emissions; value with 50% likelihood	0.45	0.45	0.45	0.45	0.45	0.45	0.45	0.45	0.45	0.45	0.45	0.45	0.45	0.45	0.45	0.45	0.45	0.45	0.45	0.45	0.45	0.45	0.45	0.45	0.45	0.45	0.45	0.45	0.45	0.45	0.45	0.45	0.45	0.45	0.45	0.45	0.45	0.45	0.45	0.45
energy storage	T_res storage	a	30			already tested in Desing et al. 2022		Desing et al. 2022	average lifetime of energy storage capacity	30	30	30	30	30	30	30	30	30	30	30	30	30	30	30	30	30	30	30	30	30	30	30	30	30	30	30	30	30	30	30	30	30	30	30	30	30	30	30	30
energy storage	T_res storage_min	a	15			already tested in Desing et al. 2022		Desing et al. 2022	minimal lifetime of capacity, i.e. all installations reach this lifetime	15	15	15	15	15	15	15	15	15	15	15	15	15	15	15	15	15	15	15	15	15	15	15	15	15	15	15	15	15	15	15	15	15	15	15	15	15	15	15	15
energy storage	maximum fraction of power stored for seasonal variations	-	0.2			already tested in Desing et al. 2022		Desing et al. 2022	seasonal variations of average daily yield throughout the year depend on the latitude. As more than 90% of the world's population live in the "sun belt" where seasonal variations are low (Victoria et al. 2021), we estimate that the maximum fraction of power stored to level out seasonal variation globally is 0.2.	0.2	0.2	0.2	0.2	0.2	0.2	0.2	0.2	0.2	0.2	0.2	0.2	0.2	0.2	0.2	0.2	0.2	0.2	0.2	0.2	0.2	0.2	0.2	0.2	0.2	0.2	0.2	0.2	0.2	0.2	0.2	0.2	0.2	0.2	0.2	0.2	0.2	0.2	0.2	0.2
energy storage	roundtrip efficiency electro-chemical storage	-	0.94			already tested in Desing et al. 2023		Desing and Widmer 2022	For Li-Ion batteries: output energy from storage / input energy into storage = 0.94 (Desing and WIdmer 2022)	0.94	0.94	0.94	0.94	0.94	0.94	0.94	0.94	0.94	0.94	0.94	0.94	0.94	0.94	0.94	0.94	0.94	0.94	0.94	0.94	0.94	0.94	0.94	0.94	0.94	0.94	0.94	0.94	0.94	0.94	0.94	0.94	0.94	0.94	0.94	0.94	0.94	0.94	0.94	0.94
energy storage	roundtrip efficiency mechanical storage	-	0.75			already tested in Desing et al. 2024		Desing and Widmer 2022	For pumped hydro storage: output energy from storage / input energy into storage = 0.75 (Desing et al. 2021)	0.75	0.75	0.75	0.75	0.75	0.75	0.75	0.75	0.75	0.75	0.75	0.75	0.75	0.75	0.75	0.75	0.75	0.75	0.75	0.75	0.75	0.75	0.75	0.75	0.75	0.75	0.75	0.75	0.75	0.75	0.75	0.75	0.75	0.75	0.75	0.75	0.75	0.75	0.75	0.75
energy storage	roundtrip efficiency chemical storage	-	0.21			already tested in Desing et al. 2025		Desing and Widmer 2022	For synthetic CH4: output energy from storage / input energy into storage = 0.21 (Desing and Widmer 2022)	0.21	0.21	0.21	0.21	0.21	0.21	0.21	0.21	0.21	0.21	0.21	0.21	0.21	0.21	0.21	0.21	0.21	0.21	0.21	0.21	0.21	0.21	0.21	0.21	0.21	0.21	0.21	0.21	0.21	0.21	0.21	0.21	0.21	0.21	0.21	0.21	0.21	0.21	0.21	0.21
energy storage	output efficiency electro-chemical storage	-	0.97			already tested in Desing et al. 2026		Desing and Widmer 2022	For Li-Ion batteries: output energy from storage / stored energy in storage = 0.97 (Desing et al. 2021)	0.97	0.97	0.97	0.97	0.97	0.97	0.97	0.97	0.97	0.97	0.97	0.97	0.97	0.97	0.97	0.97	0.97	0.97	0.97	0.97	0.97	0.97	0.97	0.97	0.97	0.97	0.97	0.97	0.97	0.97	0.97	0.97	0.97	0.97	0.97	0.97	0.97	0.97	0.97	0.97
energy storage	output efficiency mechanical storage	-	0.9			already tested in Desing et al. 2027		Desing and Widmer 2022	For pumped hydro storage: output energy from storage / stored energy in storage = 0.9 (Desing et al. 2021)	0.9	0.9	0.9	0.9	0.9	0.9	0.9	0.9	0.9	0.9	0.9	0.9	0.9	0.9	0.9	0.9	0.9	0.9	0.9	0.9	0.9	0.9	0.9	0.9	0.9	0.9	0.9	0.9	0.9	0.9	0.9	0.9	0.9	0.9	0.9	0.9	0.9	0.9	0.9	0.9
energy storage	output efficiency chemical storage	-	0.4			already tested in Desing et al. 2028		Desing and Widmer 2022	For synthetic methane: output energy from storage / stored energy in storage = 0.4 (Desing et al. 2021)	0.4	0.4	0.4	0.4	0.4	0.4	0.4	0.4	0.4	0.4	0.4	0.4	0.4	0.4	0.4	0.4	0.4	0.4	0.4	0.4	0.4	0.4	0.4	0.4	0.4	0.4	0.4	0.4	0.4	0.4	0.4	0.4	0.4	0.4	0.4	0.4	0.4	0.4	0.4	0.4
energy storage	energy intensity electro-chemical storage	-	300			already tested in Desing et al. 2029		Crenna et al. 2022, Desing and Widmer 2022	embodied electric energy / storage capacity for electro-chemical storage , i.e. batteries. E.g. for Li-Ion NMC111: 457, NMC811: 323, NCA: 339 (Crenna et al. 2020, Desing et al. 2021)	300	300	300	300	300	300	300	300	300	300	300	300	300	300	300	300	300	300	300	300	300	300	300	300	300	300	300	300	300	300	300	300	300	300	300	300	300	300	300	300
energy storage	energy intensity mechanical storage		85			already tested in Desing et al. 2030		Ecoinvent 3.8	embodied electric energy / storage capacity for mechanical storage technologies. E.g. pumped hydro storage: EI=85 (Desing et al. 2021)	85	85	85	85	85	85	85	85	85	85	85	85	85	85	85	85	85	85	85	85	85	85	85	85	85	85	85	85	85	85	85	85	85	85	85	85	85	85	85	85
energy storage	energy intensity chemical storage		63			already tested in Desing et al. 2031		Zhang_2017, Desing and Widmer 2022	embodied electric energy / storage capacity for chemical storage, i.e. synthetic fuels. E.g. PEM electrolyzer to make H2 from H2O and methanization with CO2 from DAC to CH4: EI=63 (Zhang et al. 2017, Desing et al. 2021)	63	63	63	63	63	63	63	63	63	63	63	63	63	63	63	63	63	63	63	63	63	63	63	63	63	63	63	63	63	63	63	63	63	63	63	63	63	63	63	63
energy storage	Al intensity electro-chemical storage	Gt/(TW*a)	16.25	5.1	26.8		49,50	EI3.9.1		16.25	16.25	16.25	16.25	16.25	16.25	16.25	16.25	16.25	16.25	16.25	16.25	16.25	16.25	16.25	16.25	16.25	16.25	16.25	16.25	16.25	16.25	16.25	16.25	16.25	16.25	16.25	16.25	16.25	16.25	16.25	16.25	16.25	16.25	16.25	16.25	16.25	16.25	16.25	16.25
energy storage	Al intensity mechanical storage	Gt/(TW*a)	0.004	0.0022	0.0046		51,52	EI3.9.1		0.004	0.004	0.004	0.004	0.004	0.004	0.004	0.004	0.004	0.004	0.004	0.004	0.004	0.004	0.004	0.004	0.004	0.004	0.004	0.004	0.004	0.004	0.004	0.004	0.004	0.004	0.004	0.004	0.004	0.004	0.004	0.004	0.004	0.004	0.004	0.004	0.004	0.004	0.004	0.004
energy storage	Al intensity chemical storage	Gt/(TW*a)	0.02	0.02	0.04		53	EI3.9.1		0.02	0.02	0.02	0.02	0.02	0.02	0.02	0.02	0.02	0.02	0.02	0.02	0.02	0.02	0.02	0.02	0.02	0.02	0.02	0.02	0.02	0.02	0.02	0.02	0.02	0.02	0.02	0.02	0.02	0.02	0.02	0.02	0.02	0.02	0.02	0.02	0.02	0.02	0.02	0.02
[truncated: 18 more columns]

## Sheet: Scenarios
category	parameter	unit	min	max	description	Commitment+	Comitment+ Advanced	Commitment+ Energy limit	All-in	All-in advanced	All-in Energy Limit
code
switches	fC_repair	-	0	1	decides if fossil capacity is repaired or not	1	1	1	0	0	0
	CCS switch	-	0	1	Decides if CCS is used at all or not	1	1	1	1	1	1
	fC switch	-	0	1	If 1, fC is switched off as soon as transition is complete	1	1	1	1	1	1
	fC phase out	-	0	1	If 1, fossil engine is deconstructed at an accelerated rate	1	1	1	1	1	1
demand	demand growth switch	-	0	1	If 1, "P_demand" growth exponentially. If 0, "P_demand" adjusts to "P_demand per person aim"	1	1	1	0	0	0
	population confidence selection	-	1	3	1 = low; 2=50%; 3=high	2	2	2	2	2	2
	growth rate	-	0	0.1	growth of final energy demand by society	0.006	0.006	0.006	0	0	0
	P_demand per person aim	W	0	2000	annual average energy demand per person that should be achieved	680	680	680	680	680	680
	demand adjustment delay time	a	0	100	time after the simulation starts until have of the demand adjustments are achieved	5	5	5	5	5	5
	demand adjustment duration	a	0	100	time period during which demand per person is adjusted from todays average to the target value	10	10	10	10	10	10
PV	oversize PV	-	1	10	factor of how much nominal power needs to be larger than demand P_nomPV / P_demand	1.1	1.1	1.1	1.2	1.2	1.2
	alpha	-	0	1	Fraction of PV output that is made available to the remaining system during the transition. (1-alpha is used to grow the PV engine)	0.7	0.7	0.7	0.8	0.8	0.8
	beta in transition	-	0	1	Fraction of available capacity that is used to grow PV during transition	0.6	0.6	0.6	1	1	1
	beta after transition	-	0	1	Fraction of available idle capacity that is used to grow PV after transition when [P_nomPV]<[oversize PV]*[P_demand_req]	0.5	0.5	0.5	0.5	0.5	0.5
	desert potential fraction	-	0	1	fraction of the solar potential of deserts that is allowed to be used	0.2	0.2	0.2	0	0	0
	buildings potential fraction	-	0	1	fraction of the solar potential on buildings that is allowed to be used	0.6	0.6	0.6	0.85	0.85	0.85
	PV repair proportional	-	0	1	factor for repairing PV proportional to the size of PV	0.5	0.5	0.5	0.5	0.5	0.5
	PV repair on demand	-	0	1	decides if PV is repaired immediately when it gets end of life	0	0	0	0	0	0
	PV repair inverse proportional	-	0	1	factor for repairing PV inversely proportional to overcapacity above demand	20	20	20	20	20	20
	PV repair increase limit	TW/a	na		maximum rate of change for increasing repair of PV	0.15	0.4	10	0.5	2	10
	PV repair decrease limit	TW/a	na		maximum rate of change for decreasing repair of PV	-10	-10	-10	-1	-1	-1
fossil	delta in transition	-	0	1	Fraction of the power used to grow the fossil engine during the transition	0	0	0	0	0	0
	delta for growing with demand	-	0	1	fraction of power used to grow the fossil engine to be able to follow growing demand	0.8	0.8	0.8	0.8	0.8	0.8
	tau_fC_phase_out	a	0	100	time constant for accelerated decommisioning of fossil powerplants	10	10	10	10	5	5
	fC_dep_phase_out	-	0	0.1	increased depreciation rate for fC during phase out	0.01	0.01	0.01	0.02	0.01	0.01
DAC	epsilon in transition	-	0	1	fraction of power used to build and operate CCS capacity during the transition	0.5	0.5	0.5	0	0	0
	epsilon after transition	-	0	1	fraction of power used to build and operate CCS capacity after the transition	1	1	1	1	1	1
	CCS increase limit	TW/a	0	10	maximum rate of change for increasing power for ordering new capacity	0.01	0.01	10	0.1	0.1	10
storage	independence time	a	0	0.3	independence time from renewble supply provided by storage. This determines the storage capacity needed	0.035	0.035	0.035	0.005	0.005	0.005
	fraction of daily demand stored	-	0	1	fraction of energy demand provided through storage	0.3	0.3	0.3	0.1	0.1	0.1
	relative weight chemical storage	-	0	1	fraction of chemical storage (i.e. synfuels)	0.2	0.2	0.2	0.1	0.1	0.1
	relative weight mechanical storage	-	0	1	fraction of total storage capacity of mechanical storage (i.e. pumped hydro)	0.2	0.2	0.2	0.2	0.2	0.2
	relative weight electro-chemical storage	-	0	1	fraction of total storage capacity of electro-chemical storage (i.e. batteries)	0.6	0.6	0.6	0.8	0.8	0.8
	storage building time constant	a	0	0.01	adjustment time constant for maintaining storage capacity	0.003	0.003	0.003	0.001	0.001	0.001
controls	K_P	-	0	10	proportional control constant	8	8	8	8	8	8
	K_I	-	0	10	integrated control constant	1	1	1	1	1	1
	K_D	-	0	1	differential control constant	0.001	0.001	0.001	0.001	0.001	0.001
	gamma	-	0	1	Fraction of available power for internal demand that is utilized	0.95	0.95	0.95	0.95	0.95	0.95
	K_fC drain	-	0	10	speed with which fossil output is reduced to zero	0.1	0.1	0.1	2	2	2
	_PV_alpha decrease limit	-	0	-100	speed with which exponential growth of PV system is stopped after transition is complete	-0.4	-2	-10	-0.5	-2	-10
materials	material supply constrain switch	-	0	1	decides if material supply constraints are considered	1	1	0	1	1	0
Al controls	Al prim supply gap correction exponent	-	0	10	determines the steepness of the exponential function for how fast supply constraints become active	6	6	6	4	6	6
	Al prim CF correction threshold	-	0	1	determines from which Al prim CF onwards supply gap correction function is active	0	0	0	0	0	0
	K_p for Al prim CF	-	0	1	proportional control constant	0.4	0.3	0.3	0.4	0.6	0.3
	K_i for Al prim CF	-	0	1	integrated control constant	0	0	0	0	0	0
	K_d for Al prim CF	-	0	1	differential control constant	0	0	0	0	0	0
	Al CF market factor	-	0	1	factor considering market changes in the control of Al prim CF	0.6	0.6	0.6	0.3	0.1	1
	Al CF market filling factor	-	0	1	factor considering stockpiling in the market in the control of Al prim CF	0.3	0.4	0.4	0.7	0.2	0.4
	Al market filling exponent	-	1	10		2	2	3	3	1	1
	Al market shortage correction exponent	-	1	10		5	1	2	2	2	2
Al capacity	Al prim construction time	a	0	100	average time after which new primary capacity gets into operation	7	5	0.2	7	5	0.2
	Al prim min construction time	a	0	100	minimum time for construction primary capacity	3	2.5	0.1	3	2.5	0.1
	Al prim CF building threshold	-	0	1	CF from which onwards new capacity is added	0.7	0.7	0	0.7	0.7	0
	Al prim permitting factor	-	0	1	factor determining how much of the ordered capacity is actually built	0.2	0.2	1	0.2	0.2	1
	Al capacity building exponent	-	1	10	exponent determining the shape of the capacity building function	2	2	2	2	2	2
	Al recycling construction time	a	0	100	average construction time for secondary capacity	2	1	1	2	1	0.1
	Al recycling CF building threshold	-	0	1	CF from which onwards new capacity is added	0.7	0.7	0	0.7	0.7	0
	Al sec capacity building exponent	-	1	10	exponent determining the shape of the capacity building function	2	2	2	2	2	2
	Al recycling increase limit	-	0	10	maximum increase of recycling flow	1	1	1	1	1	10
	Al recycling decrease limit	-	0	-10	maximum decrease of recycling flow	-1	-1	-1	-1	-1	-10
	Al recycling permitting factor	-	0	1	factor determining how much of the ordered capacity is actually built	0.2	0.2	1	0.2	0.2	1
	Al dilution tau	a	0	100	time constant for dilution requirement change	50	10	1	50	10	1
	Al dilution ratio inf	-	0	10	dilution ration that is assymtotically achieved	0.5	0.1	0.01	0.5	0.1	0.01
Al PV	PV material intensity switch	-	0	2	decides if Al PV is not replaced (0), gradually replaced (1), or immediately replaced (2)	0	1	0	0	2	0
	PV Al intensity tau	a	0	100	time constant for replacment of Al in PV	60	5	60	60	5	0.1
Al society	societal Al intensity inf factor	-	0	1	reduction of initial Al intenstiy of society	0.9478	0.9478	0.9478	0.9478	0.9478	0.9478
	societal Al intensity increase factor	-	1	2		1.404	1.404	1.404	1.05	1.05	1.05
	societal Al intensity tau	a	0	100	time constant for reducing Al intensity of society	12	12	12	6	6	6
Al DAC	DAC Al intensity tau	a	0	100	time constant for reducing Al intensity of DAC	50	30	0.1	50	30	0.1
